# Supplementary material for: Depressive Symptoms, Systemic Inflammation, and Survival Among Patients With Head and Neck Cancer
Source: PubMed Central journal article supplement (PMC10979366; doi:10.1001/jamaoto.2024.0231), 2024-03-28
Supplement: jamaotolaryngolheadnecksurg-e240231-s001.pdf [file jamaotolaryngolheadnecksurg-e240231-s001.pdf]

## Data Sharing Statement

Cash. Depressive Symptoms, Systemic Inflammation, and Survival Among Patients With Head and Neck Cancer. *JAMA Otolaryngol Head Neck Surg*. Published March 28, 2024.

doi:10.1001/jamaoto.2024.0231

### Data

**Data available:** Yes

**Data types:** Deidentified participant data

**How to access data:** The data underlying this article are available in OpenICPSR.org, at <https://dx.doi.org/10.3886/E193207V1>

**When available:** beginning date: 08-01-2025

### Supporting Documents

**Document types:** Statistical/analytic code

**How to access documents:** The supporting documents underlying this article are available in OpenICPSR.org, at <https://dx.doi.org/10.3886/E193207V1>

**When available:** beginning date: 08-01-2025

### Additional Information

**Who can access the data:** The data underlying this article are available in OpenICPSR.org, at <https://dx.doi.org/10.3886/E193207V1>

**Types of analyses:** None.

**Mechanisms of data availability:** Without investigator support.
